# Supplementary material for: Cement-Based Composites Containing Oxidized Graphene Nanoplatelets: Effects on the Mechanical and Electrical Properties
Source: MDPI journal article supplement (doi:10.3390/nano13050901), 2023-02-27
Supplement: s1 [file s1]

# Cement-Based Composites Containing Oxidized Graphene Nanoplatelets: Effects on the Mechanical and Electrical Properties

Luca Lavagna<sup>1,2,\*</sup>, Andrea Santagati<sup>1</sup>, Mattia Bartoli<sup>2,3</sup>, Daniel Suarez-Riera<sup>2,4</sup>, and Matteo Pavese<sup>1,2,\*</sup>

<sup>1</sup> Department of Applied Science and Technology, Politecnico di Torino, C.so Duca degli Abruzzi 24, 10129, Torino, Italy; andrea.santagati@studenti.polito.it

<sup>2</sup> Consorzio Interuniversitario Nazionale per la Scienza e Tecnologia dei Materiali (INSTM), Via G. Giusti 9, Florence, 50121, Italy

<sup>3</sup> Center for Sustainable Future, Italian Institute of Technology, Via Livorno 60, Turin 10144, Italy; mattia.bartoli@iit.it

<sup>4</sup> Department of Structural, Geotechnical and Building Engineering, Politecnico di Torino, C.so Duca degli Abruzzi 24, 10129 Torino, Italy; daniel.suarez@polito.it (D.S-R.)

\* Correspondence E-mail(s): luca.lavagna@polito.it; Tel.: (+39)0110904598 (L.L.). matteo.pavese@polito.it; Tel.: (+39)0110904674 (M.P.).

## Supporting materials

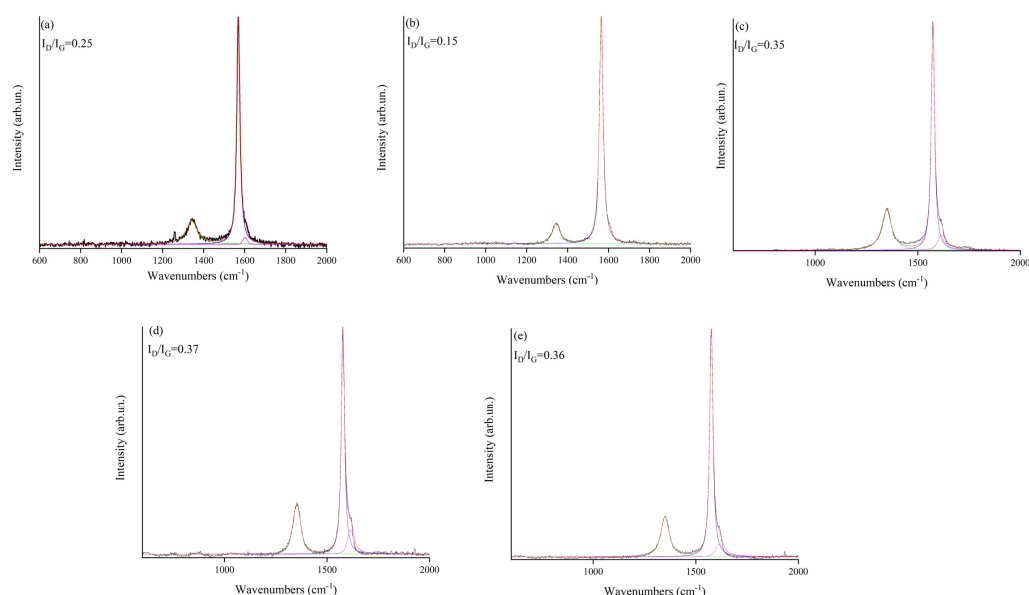

**Figure S1.** Raman plot of: GNP (a), GNP 10' (b), GNP 20' (c), GNP 40' (d), and GNP 60' (e).

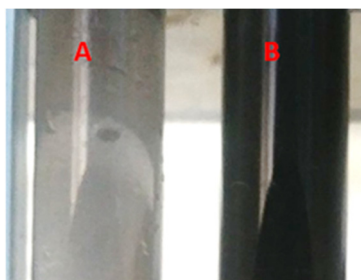

**Figure S2.** Dispersion of pristine GNP (A) and GNPs treated with sulfonitric acids for 60 minutes (B) in water.

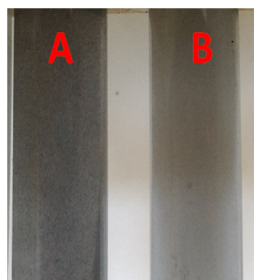

**Figure S3.** Dispersion of pristine GNP (A) and GNPs treated with sulfonitric acids for 60 minutes (B) in water after adding 3 ml of calcium hydroxide solution.

**Disclaimer/Publisher's Note:** The statements, opinions and data contained in all publications are solely those of the individual author(s) and contributor(s) and not of MDPI and/or the editor(s). MDPI and/or the editor(s) disclaim responsibility for any injury to people or property resulting from any ideas, methods, instructions or products referred to in the content.
